# Supplementary material for: Simultaneous detection and quantification of multiple pathogen targets in wastewater
Source: medRxiv preprint, doi:10.1101/2023.06.23.23291792, version 2 (2023-12-05)
Supplement: Supplemental Figure 2 [file 291792_file20.docx]

**S2 Fig.** InnovaPrep Concentrating Pipette Pellet TAC Results

Boxplot for InnovaPrep Concentrating Pipette Pellet – DNeasy PowerSoil Pro Manual extractions (n= 28 [N=30, 2 duplicates included in plots below]). The dashed line represents the log10-transformed theoretical limit of detection (1 gene copy per reaction).

**
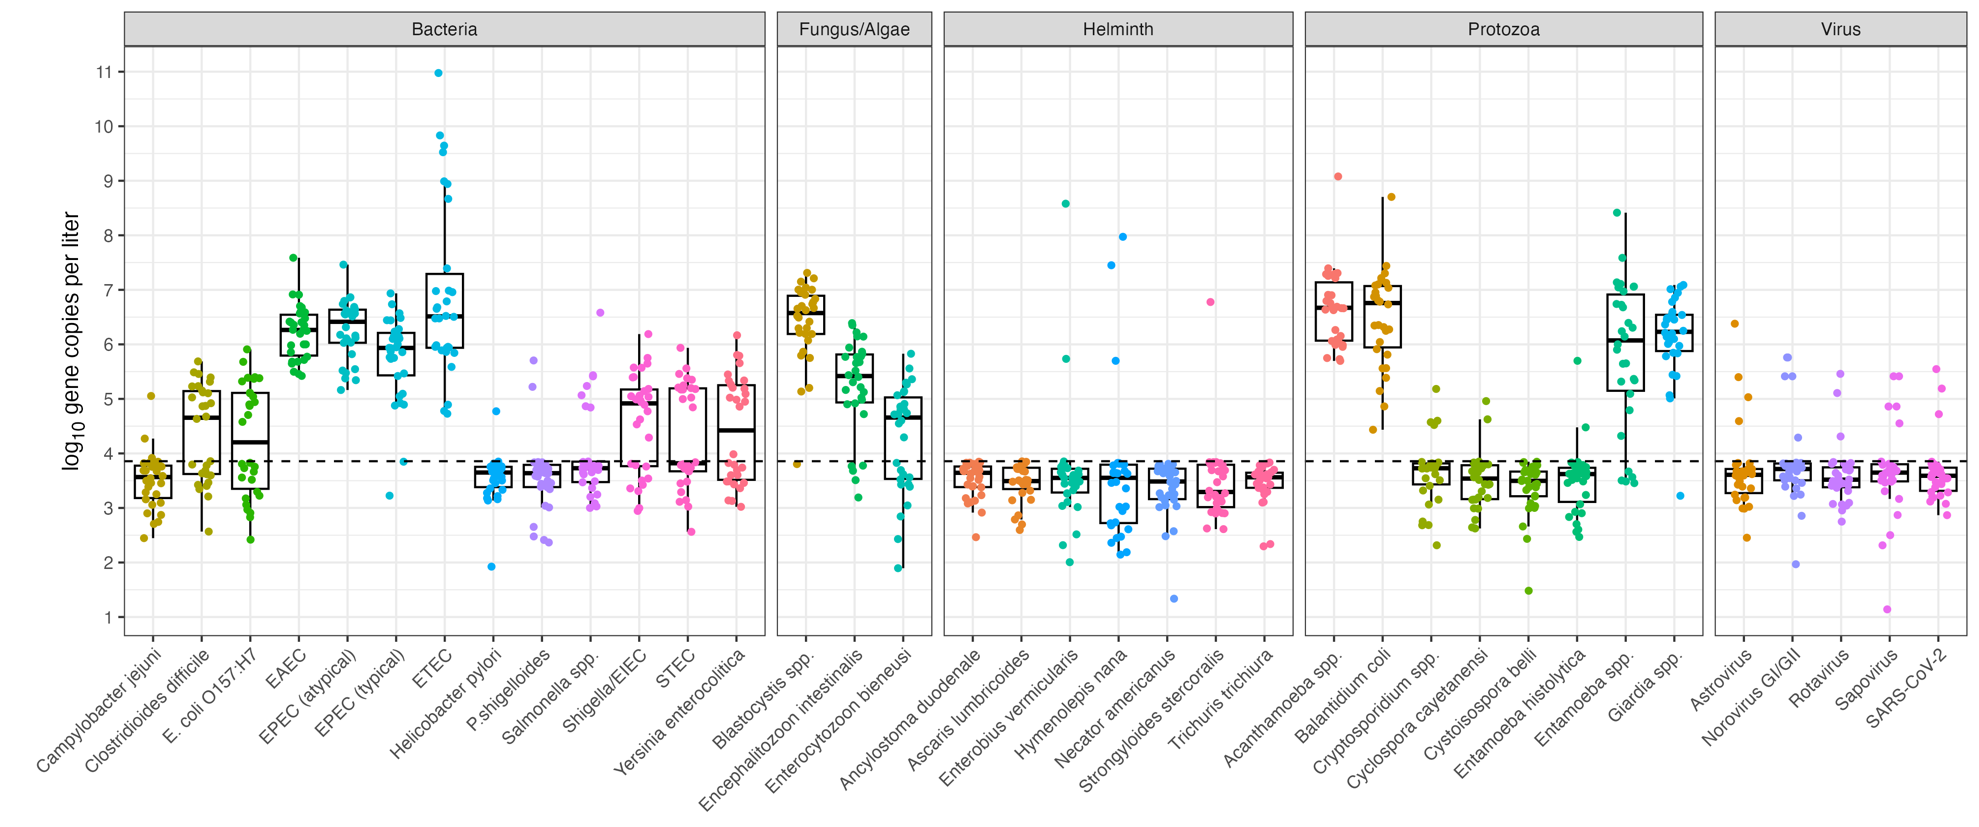
**

We processed an average of 139 mL through the InnovaPrep CP and the average CP pellet was 1.2 mL.
