# Supplementary material for: Simultaneous detection and quantification of multiple pathogen targets in wastewater
Source: medRxiv preprint, doi:10.1101/2023.06.23.23291792, version 2 (2023-12-05)

**S5 Fig.** Amplification and multicomponent plot for no-template control. The amplification occurs for MS2, PhHV, manufacture internal control, and 16S.


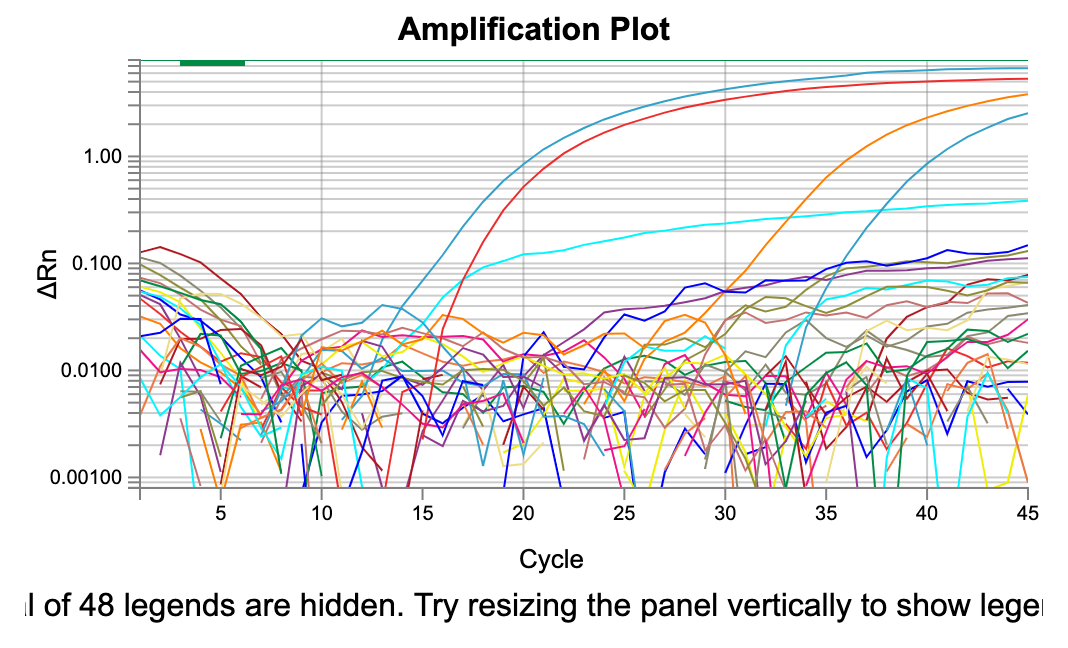

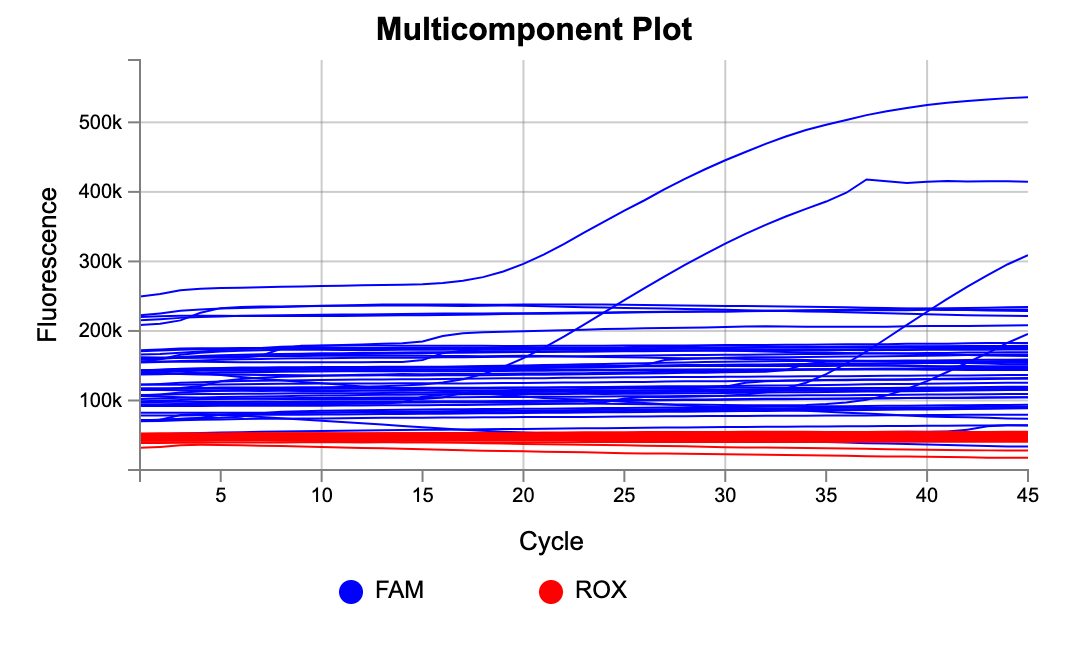

Supplement: Supplemental Figure 5 [file 291792_file17.docx]
